# Supplementary material for: In Vitro Antimicrobial Activities of Tigecycline, Eravacycline, Omadacycline, and Sarecycline against Rapidly Growing Mycobacteria
Source: PubMed Central journal article supplement (PMC9927410; doi:10.1128/spectrum.03238-22), 2022-12-08
Supplement: spectrum.03238-22-s0001.pdf [file spectrum.03238-22-s0001.pdf]

## **Supplementary data**

### **Supplementary Online Methods.**

### **Supplementary Results.**

Figure S1. Decline in Omadacycline concentration with time in CAMHB at 37°C

## SUPPLEMENTARY ONLINE METHODS

### **Omadacycline stability monitored in CAMHB by high-pressure liquid chromatography/tandem mass spectrometry (HPLC-MS/MS)**

**Standard solutions.** The stock solution of OMC and zaleplon, used as internal standard (IS), were dissolved at 1 mg/mL into Dimethyl sulfoxide (DMSO) (Sigma, Germany). The stock solution was diluted to prepare a nine-point calibration curve as follows. Briefly, the stock solution was diluted to a series of concentrations (19.53125, 39.0625, 78.125, 156.25, 312.5, 625, 1250, 2500, 5000 and 10000 µg/L) with OMC-free CAMHB. Next, 10 µl IS (2000 µg/L) was added into 100 µl different OMC concentrations solutions. And then, a 4-fold volume of methanol was fortified into these mixtures for deproteinization. After centrifugation at 3500×g at 4°C for 15 min, the supernatant was separated for further analysis.

**Sample preparation.** Stability was monitored of four levels (0.25, 0.5, 1, and 2 mg/L) with three replicates of each group. Samples were prepared by adding the appropriate volume of stock solution into the OMC-free CAMH at 37°C. And 10 µl IS (2000 µg/L) was added into 100 µl sample supernatant before deproteinization. All samples were collected and analyzed on day 1, 3, 5 and 7.

**Instrumentation and chromatographic conditions.** Chromatography was performed on the HPLC system (Agilent Technologies, the United State) that including an autosampler (G1329A), a triple quadrupole mass spectrometer (G6420A) and a column heater (G1316A). Electrospray ionization in the positive mode (ESI+) was used for all samples. Chromatographic separation was performed with an Agilent ZORBAX SB-C18 column (2.1 x 50 mm; Agilent Technologies, the United State) for OMC and the column chamber was held at 45 °C. The mobile phases A 0.1% Formic Acid in H<sub>2</sub>O and B 0.1% FA in MeOH, were delivered at a flow rate of 0.6 mL/min (MPA:MPB 65:35, v/v) [ref]. The multiple reaction monitoring (MRM) transition was 557.5→ 453.3 ; F: 130V, CE: 26V for OMC, 306.1→ 236.1; F: 150V, CE: 29V for IS. Finally, 5 µl liquid was applied on HPLC-MS/MS.

### **Result**

The OMC declined to 52.2-70.3% of initial concentrations after 24h incubation at 37 °C, which was ranged 32.7-53.2% after 72h. Moreover, these values were decreased remarkably to 16.7-27.1% (except 0.25 mg/L group) on day 5, while the concentrations were stable between day 5 to 7. Calibration curves in the range of 19.53125–10000 µg/L for OMC were established ( $r^2 = 0.9992$ ).

[ref] Chapagain M, Pasipanodya JG, Athale S et al. Omadacycline efficacy in the hollow fibre system model of pulmonary *Mycobacterium avium* complex and potency at clinically attainable doses. J Antimicrob Chemother. 2022 May 29;77(6):1694-1705. doi: 10.1093/jac/dkac068.

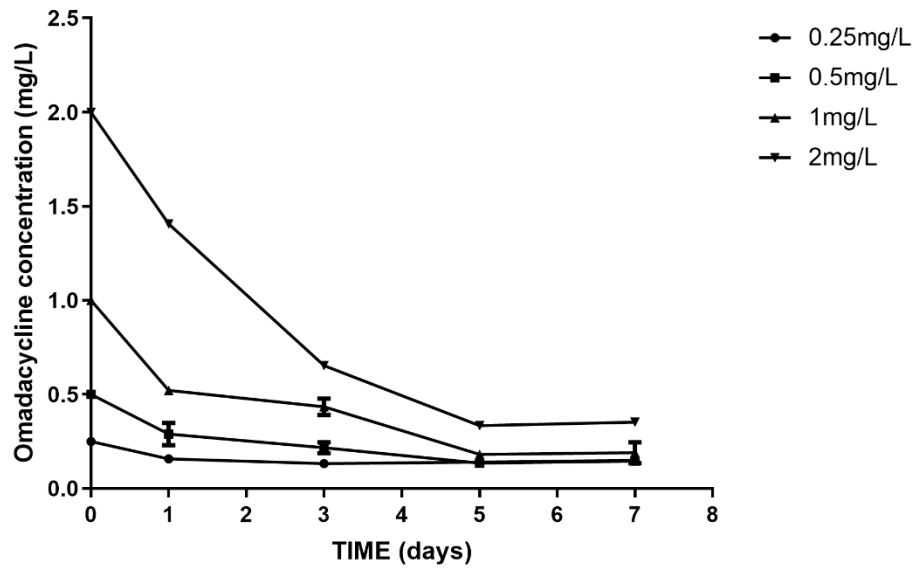

**Figure S1.** Decline in omadacycline concentration with time in CAMHB at 37°C. All data are shown as the means±SD(n=3).

**Supplementary Table S1: MICs of Tigecycline, Eravacycline, Omadacycline, and Sarecycline against the 44 *M. abscessus* subsp. *abscessus* isolates, 29 *M. abscessus* subsp. *massiliense* isolates and 43 *M. fortuitum* isolates.**

| No.Isolate | Subspecies                                    | MIC (µg/ml) |              |              |             |
|------------|-----------------------------------------------|-------------|--------------|--------------|-------------|
|            |                                               | Tigecycline | Eravacycline | Omadacycline | Sarecycline |
| 10         | <i>M. abscessus</i> subsp. <i>abscessus</i>   | 0.125       | 0.0625       | 0.5          | >8          |
| 39         | <i>M. abscessus</i> subsp. <i>abscessus</i>   | 0.25        | 0.0625       | 0.25         | >8          |
| 83         | <i>M. abscessus</i> subsp. <i>abscessus</i>   | 0.125       | 0.03125      | 0.25         | >8          |
| 104        | <i>M. abscessus</i> subsp. <i>abscessus</i>   | 0.5         | 0.125        | 0.5          | >8          |
| 111        | <i>M. abscessus</i> subsp. <i>abscessus</i>   | 0.5         | 0.0625       | 0.5          | 1           |
| 113        | <i>M. abscessus</i> subsp. <i>abscessus</i>   | 0.25        | 0.0625       | 0.25         | >8          |
| 115        | <i>M. abscessus</i> subsp. <i>abscessus</i>   | 0.25        | 0.125        | 0.5          | >8          |
| 121        | <i>M. abscessus</i> subsp. <i>abscessus</i>   | 0.25        | 0.0625       | 0.5          | >8          |
| 123        | <i>M. abscessus</i> subsp. <i>abscessus</i>   | 0.0625      | 0.03125      | 0.125        | 0.5         |
| 124        | <i>M. abscessus</i> subsp. <i>abscessus</i>   | 0.25        | 0.0625       | 0.25         | >8          |
| 128        | <i>M. abscessus</i> subsp. <i>abscessus</i>   | 0.25        | 0.03125      | 0.25         | >8          |
| 130        | <i>M. abscessus</i> subsp. <i>abscessus</i>   | 0.0625      | 0.015625     | 0.125        | 4           |
| 135        | <i>M. abscessus</i> subsp. <i>abscessus</i>   | 0.5         | 0.0625       | 0.5          | >8          |
| 146        | <i>M. abscessus</i> subsp. <i>abscessus</i>   | 0.0625      | 0.015625     | 0.125        | 0.125       |
| 164        | <i>M. abscessus</i> subsp. <i>abscessus</i>   | 0.125       | 0.03125      | 0.25         | >8          |
| 168        | <i>M. abscessus</i> subsp. <i>abscessus</i>   | 0.25        | 0.0625       | 0.25         | >8          |
| 170        | <i>M. abscessus</i> subsp. <i>abscessus</i>   | 0.25        | 0.03125      | 0.5          | >8          |
| 172        | <i>M. abscessus</i> subsp. <i>abscessus</i>   | 0.25        | 0.0625       | 0.5          | >8          |
| 263        | <i>M. abscessus</i> subsp. <i>abscessus</i>   | 0.25        | 0.125        | 0.5          | >8          |
| 269        | <i>M. abscessus</i> subsp. <i>abscessus</i>   | 0.25        | 0.0625       | 0.5          | >8          |
| 272        | <i>M. abscessus</i> subsp. <i>abscessus</i>   | 0.125       | 0.015625     | 0.125        | >8          |
| 273        | <i>M. abscessus</i> subsp. <i>abscessus</i>   | 0.125       | 0.03125      | 0.25         | >8          |
| 276        | <i>M. abscessus</i> subsp. <i>abscessus</i>   | 0.5         | 0.0625       | 0.5          | >8          |
| 277        | <i>M. abscessus</i> subsp. <i>abscessus</i>   | 0.25        | 0.03125      | 0.25         | >8          |
| 280        | <i>M. abscessus</i> subsp. <i>abscessus</i>   | 0.5         | 0.0625       | 0.5          | >8          |
| 657        | <i>M. abscessus</i> subsp. <i>abscessus</i>   | 0.25        | 0.015625     | 0.25         | 8           |
| 665        | <i>M. abscessus</i> subsp. <i>abscessus</i>   | 0.0625      | 0.03125      | 0.25         | >8          |
| 666        | <i>M. abscessus</i> subsp. <i>abscessus</i>   | 0.5         | 0.0625       | 0.25         | 8           |
| 682        | <i>M. abscessus</i> subsp. <i>abscessus</i>   | 0.0625      | 0.015625     | 0.0625       | 0.125       |
| 690        | <i>M. abscessus</i> subsp. <i>abscessus</i>   | 0.5         | 0.125        | 1            | >8          |
| 696        | <i>M. abscessus</i> subsp. <i>abscessus</i>   | 0.0625      | 0.015625     | 0.125        | 2           |
| 702        | <i>M. abscessus</i> subsp. <i>abscessus</i>   | 0.0625      | 0.015625     | 0.125        | 2           |
| 711        | <i>M. abscessus</i> subsp. <i>abscessus</i>   | 0.0625      | 0.015625     | 0.0625       | 2           |
| 715        | <i>M. abscessus</i> subsp. <i>abscessus</i>   | 0.125       | 0.0625       | 0.25         | 4           |
| 736        | <i>M. abscessus</i> subsp. <i>abscessus</i>   | 0.25        | 0.0625       | 0.5          | >8          |
| 747        | <i>M. abscessus</i> subsp. <i>abscessus</i>   | 0.5         | 0.25         | 1            | >8          |
| 778        | <i>M. abscessus</i> subsp. <i>abscessus</i>   | 0.25        | 0.0625       | 0.25         | 1           |
| 779        | <i>M. abscessus</i> subsp. <i>abscessus</i>   | 0.125       | 0.0625       | 0.25         | 4           |
| 800        | <i>M. abscessus</i> subsp. <i>abscessus</i>   | 0.5         | 0.0625       | 1            | 4           |
| 801        | <i>M. abscessus</i> subsp. <i>abscessus</i>   | 0.125       | 0.03125      | 0.25         | 2           |
| 811        | <i>M. abscessus</i> subsp. <i>abscessus</i>   | 0.125       | 0.03125      | 0.5          | >8          |
| 847        | <i>M. abscessus</i> subsp. <i>abscessus</i>   | 0.25        | 0.0625       | 0.5          | >8          |
| 848        | <i>M. abscessus</i> subsp. <i>abscessus</i>   | 1           | 0.125        | 0.5          | >8          |
| 859        | <i>M. abscessus</i> subsp. <i>abscessus</i>   | 0.0625      | 0.03125      | 0.125        | 8           |
| 17         | <i>M. abscessus</i> subsp. <i>massiliense</i> | 0.125       | 0.0625       | 0.5          | 8           |
| 26         | <i>M. abscessus</i> subsp. <i>massiliense</i> | 0.25        | 0.03125      | 0.25         | >8          |
| 105        | <i>M. abscessus</i> subsp. <i>massiliense</i> | 0.5         | 0.0625       | 0.5          | >8          |
| 106        | <i>M. abscessus</i> subsp. <i>massiliense</i> | 0.25        | 0.0625       | 1            | >8          |

|      |                                               |          |          |       |     |
|------|-----------------------------------------------|----------|----------|-------|-----|
| 107  | <i>M. abscessus</i> subsp. <i>massiliense</i> | 1        | 0.125    | 0.5   | >8  |
| 108  | <i>M. abscessus</i> subsp. <i>massiliense</i> | 0.25     | 0.0625   | 0.5   | >8  |
| 109  | <i>M. abscessus</i> subsp. <i>massiliense</i> | 1        | 0.0625   | 0.5   | >8  |
| 112  | <i>M. abscessus</i> subsp. <i>massiliense</i> | 0.125    | 0.015625 | 0.125 | 2   |
| 116  | <i>M. abscessus</i> subsp. <i>massiliense</i> | 0.25     | 0.015625 | 0.125 | 8   |
| 119  | <i>M. abscessus</i> subsp. <i>massiliense</i> | 0.5      | 0.0625   | 1     | >8  |
| 120  | <i>M. abscessus</i> subsp. <i>massiliense</i> | 0.5      | 0.0625   | 1     | >8  |
| 122  | <i>M. abscessus</i> subsp. <i>massiliense</i> | 0.125    | 0.015625 | 0.25  | >8  |
| 126  | <i>M. abscessus</i> subsp. <i>massiliense</i> | 0.0625   | 0.015625 | 0.125 | 8   |
| 131  | <i>M. abscessus</i> subsp. <i>massiliense</i> | 0.5      | 0.0625   | 0.5   | >8  |
| 133  | <i>M. abscessus</i> subsp. <i>massiliense</i> | 0.5      | 0.0625   | 0.5   | 8   |
| 234  | <i>M. abscessus</i> subsp. <i>massiliense</i> | 0.25     | 0.125    | 0.5   | >8  |
| 242  | <i>M. abscessus</i> subsp. <i>massiliense</i> | 1        | 0.25     | 1     | >8  |
| 274  | <i>M. abscessus</i> subsp. <i>massiliense</i> | 0.25     | 0.0625   | 0.25  | >8  |
| 659  | <i>M. abscessus</i> subsp. <i>massiliense</i> | 0.25     | 0.0625   | 0.25  | >8  |
| 674  | <i>M. abscessus</i> subsp. <i>massiliense</i> | 0.125    | 0.015625 | 0.25  | >8  |
| 678  | <i>M. abscessus</i> subsp. <i>massiliense</i> | 0.25     | 0.0625   | 0.25  | 8   |
| 679  | <i>M. abscessus</i> subsp. <i>massiliense</i> | 0.25     | 0.0625   | 0.5   | >8  |
| 704  | <i>M. abscessus</i> subsp. <i>massiliense</i> | 0.03125  | 0.015625 | 0.25  | >8  |
| 740  | <i>M. abscessus</i> subsp. <i>massiliense</i> | 0.125    | 0.03125  | 0.25  | >8  |
| 749  | <i>M. abscessus</i> subsp. <i>massiliense</i> | 0.25     | 0.125    | 0.5   | 8   |
| 759  | <i>M. abscessus</i> subsp. <i>massiliense</i> | 0.25     | 0.0625   | 0.5   | 4   |
| 776  | <i>M. abscessus</i> subsp. <i>massiliense</i> | 0.25     | 0.0625   | 0.25  | 8   |
| 783  | <i>M. abscessus</i> subsp. <i>massiliense</i> | 0.25     | 0.0625   | 0.5   | >8  |
| 802  | <i>M. abscessus</i> subsp. <i>massiliense</i> | 0.25     | 0.0625   | 0.25  | 2   |
| 1    | <i>M. fortuitum</i>                           | 0.03125  | 0.015625 | 0.25  | >8  |
| 4    | <i>M. fortuitum</i>                           | 0.0625   | 0.015625 | 0.5   | >8  |
| 5    | <i>M. fortuitum</i>                           | 0.015625 | 0.015625 | 0.5   | 4   |
| 6    | <i>M. fortuitum</i>                           | 0.015625 | 0.007813 | 0.5   | 4   |
| 7    | <i>M. fortuitum</i>                           | 0.03125  | 0.015625 | 0.25  | 8   |
| 9    | <i>M. fortuitum</i>                           | 0.0625   | 0.015625 | 0.5   | >8  |
| 31   | <i>M. fortuitum</i>                           | 0.015625 | 0.007813 | 0.125 | >8  |
| 101  | <i>M. fortuitum</i>                           | 2        | 0.25     | 8     | 4   |
| 103  | <i>M. fortuitum</i>                           | 0.015625 | 0.007813 | 0.25  | >8  |
| 114  | <i>M. fortuitum</i>                           | 0.015625 | 0.007813 | 0.25  | >8  |
| 117  | <i>M. fortuitum</i>                           | 0.03125  | 0.015625 | 0.5   | 1   |
| 118  | <i>M. fortuitum</i>                           | 0.015625 | 0.007813 | 0.25  | >8  |
| 129  | <i>M. fortuitum</i>                           | 0.03125  | 0.007813 | 0.25  | >8  |
| 267  | <i>M. fortuitum</i>                           | 0.015625 | 0.007813 | 0.25  | >8  |
| 433  | <i>M. fortuitum</i>                           | 0.0625   | 0.015625 | 0.5   | >8  |
| 446  | <i>M. fortuitum</i>                           | 0.015625 | 0.007813 | 0.25  | >8  |
| 534  | <i>M. fortuitum</i>                           | 0.015625 | 0.007813 | 0.125 | >8  |
| 658  | <i>M. fortuitum</i>                           | 0.03125  | 0.007813 | 0.5   | >8  |
| 925  | <i>M. fortuitum</i>                           | 0.015625 | 0.007813 | 0.125 | 1   |
| 987  | <i>M. fortuitum</i>                           | 0.015625 | 0.015625 | 0.5   | >8  |
| 1021 | <i>M. fortuitum</i>                           | 0.25     | 0.03125  | 0.25  | >8  |
| 1265 | <i>M. fortuitum</i>                           | 0.25     | 0.0625   | 0.5   | >8  |
| 1280 | <i>M. fortuitum</i>                           | 0.25     | 0.0625   | 0.5   | >8  |
| 1316 | <i>M. fortuitum</i>                           | 0.0625   | 0.015625 | 0.5   | >8  |
| 1594 | <i>M. fortuitum</i>                           | 0.0625   | 0.007813 | 0.5   | >8  |
| 1989 | <i>M. fortuitum</i>                           | 0.0625   | 0.015625 | 0.25  | 0.5 |
| 1990 | <i>M. fortuitum</i>                           | 0.03125  | 0.015625 | 0.25  | 0.5 |
| 1991 | <i>M. fortuitum</i>                           | 0.03125  | 0.015625 | 0.25  | 0.5 |

|      |                     |         |          |       |      |
|------|---------------------|---------|----------|-------|------|
| 2088 | <i>M. fortuitum</i> | 0.0625  | 0.015625 | 0.5   | >8   |
| 2148 | <i>M. fortuitum</i> | 0.03125 | 0.007813 | 0.25  | 0.5  |
| 2237 | <i>M. fortuitum</i> | 0.0625  | 0.015625 | 0.5   | >8   |
| 2297 | <i>M. fortuitum</i> | 0.0625  | 0.015625 | 0.5   | 2    |
| 2480 | <i>M. fortuitum</i> | 0.0625  | 0.015625 | 0.5   | 1    |
| 2481 | <i>M. fortuitum</i> | 0.03125 | 0.015625 | 0.25  | >8   |
| 2482 | <i>M. fortuitum</i> | 0.0625  | 0.015625 | 0.5   | >8   |
| 2483 | <i>M. fortuitum</i> | 0.03125 | 0.015625 | 0.5   | >8   |
| 2484 | <i>M. fortuitum</i> | 0.03125 | 0.007813 | 0.25  | 1    |
| 2624 | <i>M. fortuitum</i> | 0.03125 | 0.007813 | 0.5   | >8   |
| 2625 | <i>M. fortuitum</i> | 0.0625  | 0.015625 | 0.5   | >8   |
| 2696 | <i>M. fortuitum</i> | 0.125   | 0.03125  | 0.5   | >8   |
| 2697 | <i>M. fortuitum</i> | 0.03125 | 0.007813 | 0.125 | 0.25 |
| 2698 | <i>M. fortuitum</i> | 0.0625  | 0.015625 | 0.5   | >8   |
| 2699 | <i>M. fortuitum</i> | 0.0625  | 0.015625 | 0.5   | >8   |

---

Table S2. Minimum inhibitory concentration (MIC), minimum bactericidal concentration (MBC) values, and antibacterial activities of TGC, ERC, OMC and SRC against *M. abscessus* subsp. *abscessus* and subsp. *massiliense*.

| Isolate                                           | Morphotype | Tigecycline MIC (µg/ml) |                 |               | Eravacycline (µg/ml) |     |               | Omadacycline (µg/ml) |     |               | Sarecycline (µg/ml) |     |               |
|---------------------------------------------------|------------|-------------------------|-----------------|---------------|----------------------|-----|---------------|----------------------|-----|---------------|---------------------|-----|---------------|
|                                                   |            | MIC                     | MBC             | MIC/MBC ratio | MIC                  | MBC | MIC/MBC ratio | MIC                  | MBC | MIC/MBC ratio | MIC                 | MBC | MIC/MBC ratio |
| ATCC 19977 <sup>a</sup>                           | Smooth     | 0.25                    | 4               | 16            | 0.0625               | >1  | >16           | 0.25                 | >4  | >16           | >8                  | —   | —             |
| <i>M. abscessus</i> subsp. <i>massiliense</i> 119 | Smooth     | 0.5                     | >8 <sup>b</sup> | >16           | 0.0625               | >1  | >16           | 1                    | >16 | >16           | >8                  | —   | —             |
| <i>M. abscessus</i> subsp. <i>abscessus</i> 121   | Smooth     | 0.25                    | 4               | 16            | 0.0625               | >1  | >16           | 0.5                  | >8  | >16           | >8                  | —   | —             |
| <i>M. abscessus</i> subsp. <i>massiliense</i> 106 | Rough      | 0.25                    | >4              | >16           | 0.0625               | >1  | >16           | 1                    | >16 | >16           | >8                  | —   | —             |
| <i>M. abscessus</i> subsp. <i>massiliense</i> 108 | Rough      | 0.25                    | >4              | >16           | 0.0625               | >1  | >16           | 0.5                  | >8  | >16           | >8                  | —   | —             |
| <i>M. abscessus</i> subsp. <i>massiliense</i> 120 | Rough      | 0.5                     | 8               | 16            | 0.0625               | >1  | >16           | 1                    | >16 | >16           | >8                  | —   | —             |
| <i>M. abscessus</i> subsp. <i>abscessus</i> 123   | Smooth     | 0.0625                  | — <sup>c</sup>  | —             | 0.0313               | —   | —             | 0.125                | —   | —             | 0.5                 | >8  | >16           |
| <i>M. abscessus</i> subsp. <i>abscessus</i> 146   | Smooth     | 0.0625                  | —               | —             | 0.0156               | —   | —             | 0.125                | —   | —             | 0.125               | 2   | 16            |
| <i>M. abscessus</i> subsp. <i>abscessus</i> 682   | Smooth     | 0.0625                  | —               | —             | 0.0156               | —   | —             | 0.0625               | —   | —             | 0.125               | 2   | 16            |
| <i>M. abscessus</i> subsp. <i>abscessus</i> 778   | Rough      | 0.25                    | —               | —             | 0.0625               | —   | —             | 0.25                 | —   | —             | 1                   | >16 | >16           |

<sup>a</sup>ATCC 19977 is the reference strain of *M. abscessus* subsp. *abscessus*.

<sup>b</sup>MIC values greater than the 8 mg/L value that was tested.

<sup>c</sup>not done.

Table S3. Minimum inhibitory concentration (MIC), minimum bactericidal concentration (MBC) values, and antibacterial activities of TGC, ERC, OMC and SRC against *M. fortuitum*.

| Isolate                | Tigecycline MIC (µg/ml) |       |               | Eravacycline (µg/ml) |        |               | Omadacycline (µg/ml) |     |               | Sarecycline (µg/ml) |                |               |
|------------------------|-------------------------|-------|---------------|----------------------|--------|---------------|----------------------|-----|---------------|---------------------|----------------|---------------|
|                        | MIC                     | MBC   | MIC/MBC ratio | MIC                  | MBC    | MIC/MBC ratio | MIC                  | MBC | MIC/MBC ratio | MIC                 | MBC            | MIC/MBC ratio |
| ATCC 6841 <sup>a</sup> | 0.015                   | >0.25 | >16           | 0.0078               | >0.125 | >16           | 0.5                  | 4   | 8             | 2                   | >32            | >16           |
| 1                      | 0.03                    | 0.5   | 16            | 0.015                | >0.25  | >16           | 0.25                 | 2   | 8             | >8 <sup>b</sup>     | — <sup>c</sup> | —             |
| 1021                   | 0.25                    | >4    | >16           | 0.03                 | >0.5   | >16           | 0.25                 | 4   | 16            | >8                  | —              | —             |
| 117                    | 0.03                    | 0.25  | 8             | 0.015                | >0.25  | >16           | 0.5                  | 4   | 8             | 1                   | 16             | 16            |
| 925                    | 0.015                   | >0.25 | >16           | 0.0078               | >0.125 | >16           | 0.125                | 1   | 8             | 1                   | >16            | >16           |

<sup>a</sup>ATCC 6841 is the reference strain of *M. fortuitum*.

<sup>b</sup>MIC values greater than the 8 mg/L value that was tested.

<sup>c</sup>not done.
